# Supplementary material
Source: PubMed Central journal article supplement (PMC6559381)
Supplement: NIHMS1519871-supplement-8.pdf [file NIHMS1519871-supplement-8.pdf]

**Table S3. Vulval rupture frequency of *let-7* (n2853) worms co-cultured with NO-deficient bacteria at permissive (15°C) and non-permissive (25°C) temperatures. Related to Figure 5.**

| <b>Diet source of <i>C. elegans let-7</i> (n2853)</b> | <b>Temperature</b> | <b>Number of dead (ruptured) worms</b> | <b>Total number of worms (N)</b> |
|-------------------------------------------------------|--------------------|----------------------------------------|----------------------------------|
| WT <i>B. subtilis</i>                                 | 25°C               | 54                                     | 58                               |
| $\Delta$ nos <i>B. subtilis</i>                       | 25°C               | 53                                     | 60                               |
| WT <i>B. subtilis</i>                                 | 15°C               | 0                                      | 60                               |
| $\Delta$ nos <i>B. subtilis</i>                       | 15°C               | 0                                      | 60                               |
