# Supplementary material
Source: PubMed Central journal article supplement (PMC6559381)

# Figure S1

**A**

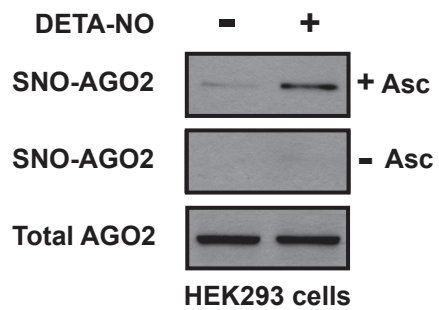

**B**

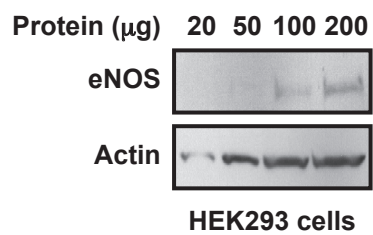

Supplement: NIHMS1519871-supplement-1.pdf [file NIHMS1519871-supplement-1.pdf]

Figure S2

A

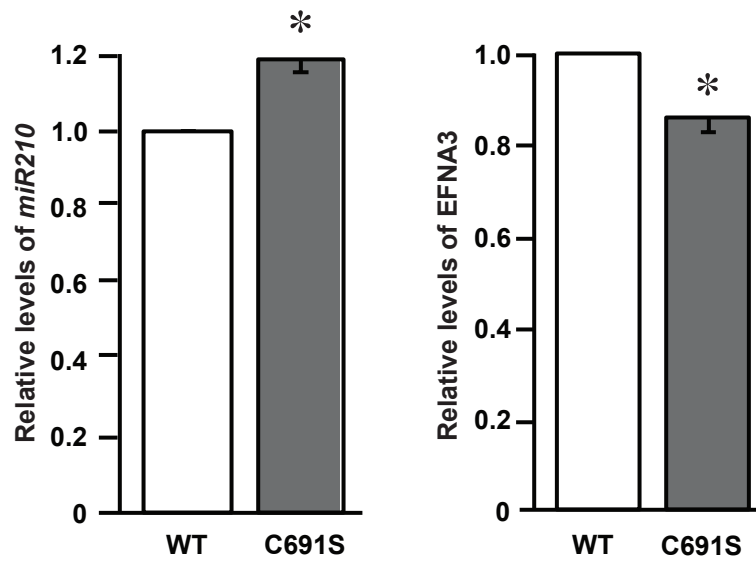

B

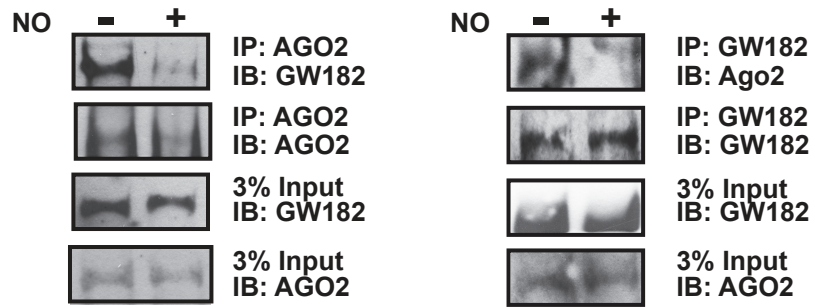

Supplement: NIHMS1519871-supplement-2.pdf [file NIHMS1519871-supplement-2.pdf]

Figure S3

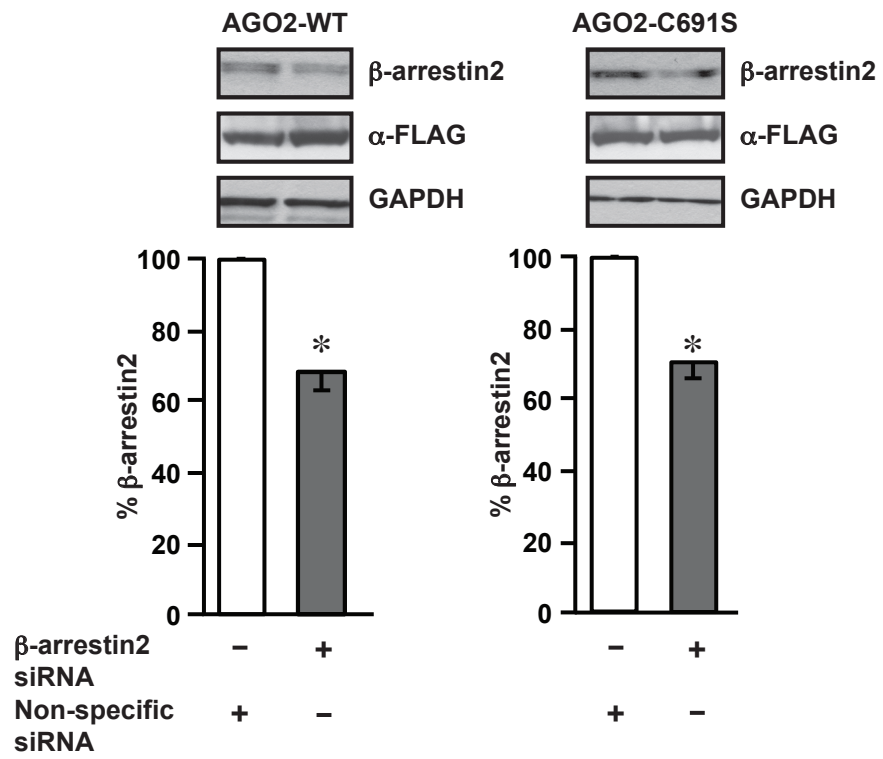

Supplement: NIHMS1519871-supplement-3.pdf [file NIHMS1519871-supplement-3.pdf]

Figure S4

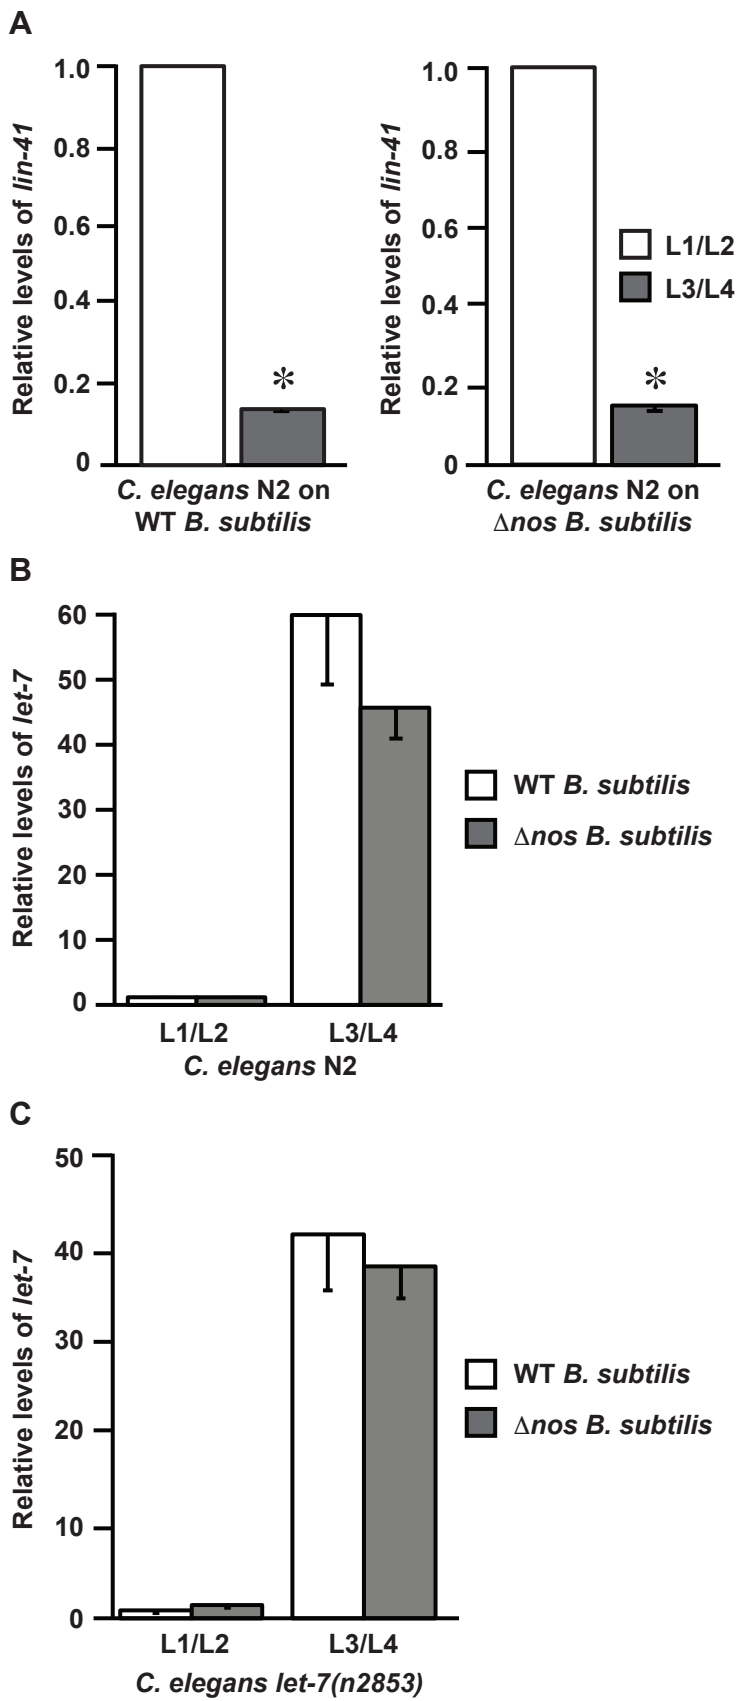

Supplement: NIHMS1519871-supplement-4.pdf [file NIHMS1519871-supplement-4.pdf]

## Figure S5

A

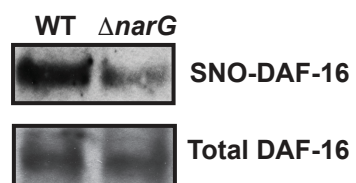

B

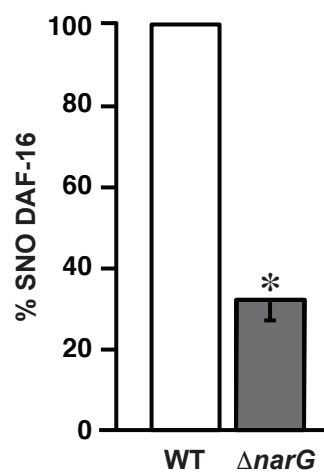

Supplement: NIHMS1519871-supplement-5.pdf [file NIHMS1519871-supplement-5.pdf]
